# Supplementary material for: Spatially-extended 3D magnetic DNA nanodevice-based split-type photoelectrochemical strategy for sensitive and reliable miRNA detection in cancer cells
Source: Royal Society of Chemistry journal article supplement (doi:10.1039/d2an00712f), 2022-01-01
Supplement: d2an00712f1.pdf [file d2an00712f1.pdf]

## Supplementary Material

### **Spatially-extended 3D Magnetic DNA Nanodevice-Based Split-Type photoelectrochemical Strategy for Sensitive and Reliable MiRNA**

#### **Detection in Cancer Cells**

**Hui Yuan,<sup>a</sup> Jiuming Sun,<sup>a</sup> Qi Zhang,<sup>a</sup> Mingyue Chu,<sup>a</sup> Guiguang Cheng,<sup>b</sup> Xia Li,<sup>\*a</sup>  
Qingwang Xue<sup>\*a</sup>**

*<sup>a</sup>School of Chemistry and Chemical Engineering, Liaocheng University, Liaocheng  
252059, China*

*<sup>b</sup>Faculty of Agriculture and Food, Kunming University of Science and Technology,  
Kunming, China*

*Correspondence: [lixia@lcu.edu.cn](mailto:lixia@lcu.edu.cn) (X. L.); [xueqingwang1983@163.com](mailto:xueqingwang1983@163.com) (Q-W. X)*

## Table of Contents

|                                                                                                                                                                                                                    |           |
|--------------------------------------------------------------------------------------------------------------------------------------------------------------------------------------------------------------------|-----------|
| <b>Experimental Part</b> .....                                                                                                                                                                                     | <b>3</b>  |
| <b>Table S1.</b> Sequences of oligonucleotides used in this study.....                                                                                                                                             | <b>6</b>  |
| <b>Fig. S1.</b> The second structure of high folded DNA scaffolds unit and the microscopic characterization of the 3D magnetic DNA nanodevices .....                                                               | <b>7</b>  |
| <b>Fig. S2.</b> The selection of light source wavelength and switching time interval .....                                                                                                                         | <b>8</b>  |
| <b>Fig. S3.</b> The real-time monitoring of photoelectric response the coexistence system of MB and MB/high-order DNA scaffolds complex.....                                                                       | <b>9</b>  |
| <b>Fig. S4.</b> Effect of the concentration of phi 29 DNA polymerase (a), RCA time (b); the concentration of short DNA (c); and the concentration of magnetic beads (d) on the PEC response of sensing system..... | <b>11</b> |
| <b>Table S2.</b> Comparison of different methods for miR-21 detection.....                                                                                                                                         | <b>12</b> |

## **Experimental section**

### **Chemicals**

Methylene blue (MB), Deoxynucleotide triphosphates (dNTPs) and all the HPLC-purified oligonucleotide sequences were obtained from Sangon Biotech Co., Ltd. (Shanghai, China). DNA oligonucleotide sequences were shown in **Table S1**. T4 DNA ligase, phi 29 DNA polymerase, rNTP Mix and RNase inhibitor were purchased from New England Biolabs, Ltd (Beijing, China). Streptavidin-magnetic nanobeads (streptavidin-MBs, the mean diameter is 300 nm) were purchased from Biomag Biotechnology Co., Ltd (Wuxi, China). All other reagents were of analytical grade. All aqueous solutions were prepared using ultra-pure water ( $\geq 18 \text{ M}\Omega \text{ cm}^{-1}$ ) and treated with DEPC.

### **Apparatus**

Agarose gel electrophoresis analysis was performed on an electrophoresis analyzer and gel imaging was accomplished on a Molecular Imager® GelDoc™ XR+ imaging system (Bio-Rad, USA). All photoelectrochemical tests were measured on ZAHNER-PP21 (Zana, Germany). The UV-vis absorption spectra were collected on a UH-4150 spectrophotometer (Hitachi, Japan). AFM were collected on Bruker Multimode 8 (USA). Isothermal titration calorimetry (ITC) experiments were carried out using a MicroCal ITC200 titration calorimeter (GE Healthcare, USA).

### **Preparation and of space-expanded 3D magnetic DNA nanodevice**

The first stage of space-expanded 3D magnetic DNA nanodevice involves the target recognition and RCA amplification reaction process, which was performed in a homogeneous solution as follows: target miR-21 and padlock probe were mixed in 1×T4 DNA ligase buffer (40 mM Tris-HCl, 10 mM MgCl<sub>2</sub>, 10 mM DTT, 0.5 mM ATP, pH 7.80). The mixture was heated to 90 °C for 5 min and then slowly cooled to room temperature, yielding circular DNA with a nick. Subsequently, the nicked

circular DNA was connected by incubation with T4 DNA ligase in 10×T4 DNA ligase buffer overnight ligation reaction followed by 65 °C for 10 min. Second, the RCA reaction occurred at 37 °C for 2 h with the addition of 10× phi 29 DNA polymerase buffer, phi 29 DNA polymerase and dNTP followed by 65 °C for 10 min. The mixture for the resulting DNA strands and three primers (biotin-P1, P2 and P3) were incubated in TAE/Mg<sup>2+</sup> buffer (20 mM Tris, 10 mM acetic acid, 1 mM EDTA and 6.25 mM magnesium acetate, pH 7.60) solution, which was heated to 90 °C for 5 min and then slowly cooled to room temperature, folding into predetermined high-order DNA scaffolds. Finally, streptavidin-modified MB was added to the above solution, and high-order DNA scaffolds were anchored to magnetic particles through avidin-biotin to form 3D magnetic DNA nanodevices.

### **Construction of Split-type “turn-off” PEC biosensor**

In order to obtain the negatively charged FTO electrode surface for PEC measurement, the processing involved was shown in Supplementary Material (part I). The as-mentioned magnetic DNA nanodevices were transferred the into 30 µL (1mg/ml) MB solution (containing 0.1 M Ascorbic Acid (AA) and 0.2 M Na<sub>2</sub>SO<sub>4</sub>, pH 7.80) and was incubated at 37 ° C for 2 h. The visible light source ( $\lambda=629$  nm) is used to 15 s (**Fig.S2**). After magnetically separated of the bound MB with the as-designed magnetic DNA nanodevice, the photocurrent signal for the rest of the MB solution was measured towards bare FTO electrode. The bare FTO electrodes with surface area 2.5 cm × 3 cm were ultrasonically cleaned for 1 h in 1 M NaOH, water/ethanol (1:1, V/V), acetone and ultra-pure water, followed by blown dry with nitrogen gas, respectively. Upon visible light illumination (**Fig. S2**), the MB can transform to leuco-MB, and the subsequent current generation occurs in the presence of strong reducing agents AA as illustrated below.

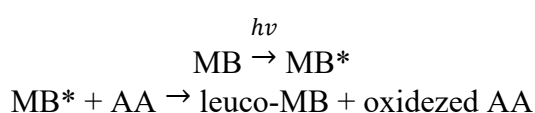

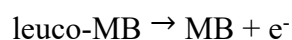

### **Agarose gel electrophoresis analysis**

For agarose gel electrophoresis analysis, the RCA amplification products and the resulting high-order folded DNA nanostructure were run on 2% agarose gel electrophoresis in 1×TAE buffer for 45 min with a constant voltage of 90 V at 0 ° C, followed by the EB staining and visualization in gel imaging system (Molecular Imager® GelDoc™ XR+)

### **Isothermal titration calorimetry**

All ITC experiments were conducted using MicroCal ITC200 titration calorimeter using protocols developed in our laboratory. For all ITC measurements, the reference power and stirring speed were set at 5  $\mu\text{cal}\cdot\text{s}^{-1}$  and 750 rpm, respectively. The calorimetric experiments were run at 310.15 K. The sample cell was filled with 4  $\mu\text{M}$  high-order DNA scaffolds solution. In each titration experiment, 20 injections of 2  $\mu\text{L}$  500  $\mu\text{M}$  MB solution (with an initial injection of 0.4  $\mu\text{L}$ ) were titrated into the sample cell. All the data were analyzed and plotted using Origin 7.0 software provided by the ITC200 calorimeter.

### **Cell lines and cell culture**

A human cervical cancer cell line (HeLa), a human lung cancer cell line (A549) and a hepatocellular carcinoma cell line (HepG2) were cultured in cell culture medium mixed with 10% FBS and 1% penicillin streptomycin. All cells were first incubated at 37 °C in a humidified atmosphere of 5%  $\text{CO}_2$ .

**Table S1. Sequences of oligonucleotides used in this study**

| <b>Name</b>          | <b>Sequence (5'-3')</b>                                                                                                                             |
|----------------------|-----------------------------------------------------------------------------------------------------------------------------------------------------|
| <b>Padlock</b>       | <u>P-CTG ATA AGC TAT AAG ATG AAG ATA GCG CAC AAT GGT CGG</u><br><u>ATT CTC AAC TCG TAT TCT CAA CTC GTA TTC TCA ACT CGT TCA</u><br><u>ACA TCA GT</u> |
| <b>Short chain 1</b> | Biotin-CCC TGA CTC <u>ACA ATG GTC GGA TTC</u> CGT CTC TG                                                                                            |
| <b>Short chain 2</b> | CAG CCC TGT <u>AAG ATG AAG ATA GCG</u> TCT ATG CC                                                                                                   |
| <b>Short chain 3</b> | <u>TCT CAA CTT CAA CTC GTA TTC TCA ACT</u> CGT AT                                                                                                   |
| <b>miR-21</b>        | <u>UAG CUU AUC AGA CUG AUG UUG A</u>                                                                                                                |
| <b>Let-7a</b>        | UGA GGU AGU AGG UUG UAU AGU U                                                                                                                       |
| <b>miR-141</b>       | UAA CAC UGU CUG GUA AAG AUG G                                                                                                                       |
| <b>miR-155</b>       | UUA AUG CUA AUC GUG AUA GGG GU                                                                                                                      |

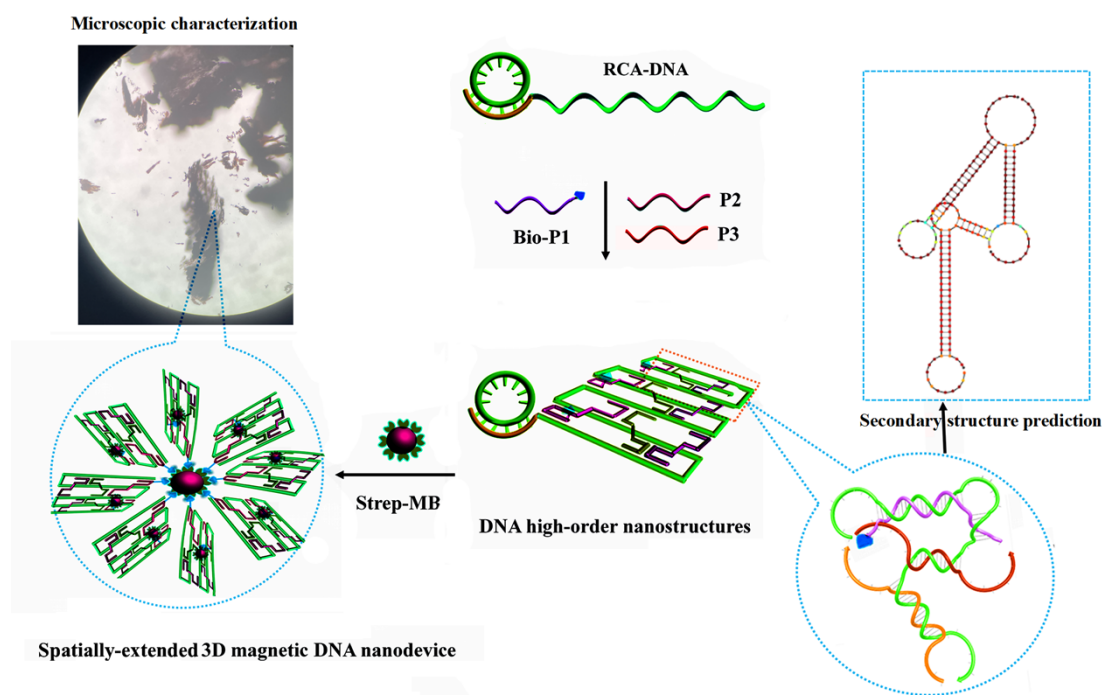

Fig. S1. The second structure of high folded DNA scaffolds unit and the microscopic characterization of the 3D magnetic DNA nanodevices

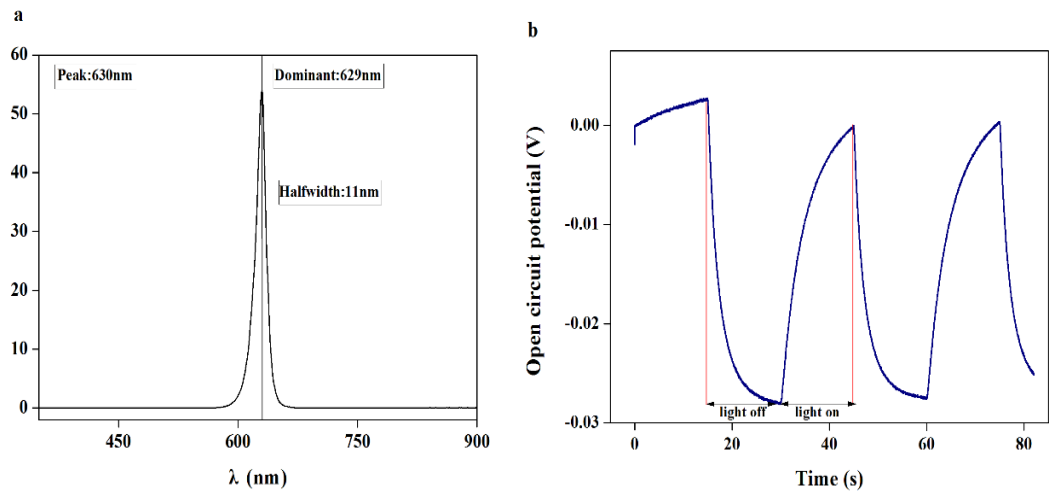

**Fig. S2.** The selection of light source wavelength (a) and switching time interval (b)



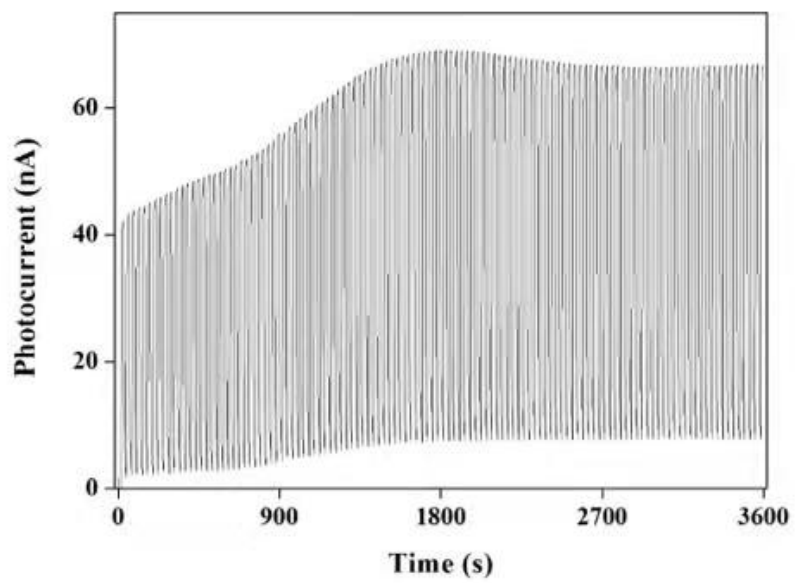

**Fig. S3.** The real-time monitoring of photoelectric response the coexistence system of MB and MB/high-order DNA scaffolds complex.

## Results and discussion

### Optimization of experimental conditions

To improve the operation performance of the as-proposed split-type PEC assay, the experimental conditions should be carefully optimized. First, both the padlock probe was hybridized with miR-21 and the resulting DNA-RNA duplex triggers the RCA polymerization was performed in homogeneous solution. The RCA reaction conditions including the amount of phi29 DNA polymerase, and the reaction time of RCA (**Fig. S4**) were optimized. The value of photocurrent change ( $\Delta I = I - I_0$ ) was adopted to appraise the performance of the PEC sensor, where  $I$  and  $I_0$  were photocurrents signal responses of this PEC sensor in the presence and absence of the target miR-21, respectively. As indicated in **Fig. S4A**, the photocurrent change ( $\Delta I$ ) increased with the increasing amount of phi29 DNA polymerase, and then increased to a maximum value at 4 U, indicating a saturated amplification. For the polymerization time of RCA (**Fig. S4B**), from 0.5 h to 5 h, the photocurrent change ( $\Delta I$ ) increases rapidly with the increase of polymerization time and reaches a plateau at 2 h. Therefore, the optimized phi29 DNA polymerase dosages of 4 U and the optimized polymerization time of 2 h were employed in the following experiments. Additionally, the amount of three short stable strands (biton-P1, P2, P3) plays an important role in formation of high-order DNA scaffolds. As shown in **Fig. S4C**, the concentration of 4  $\mu\text{M}$  biton-P1, P2, P3 was found to give the best PEC response, indicating that it was sufficient for forming well-defined DNA scaffolds. Finally, in order to full removal of the target miR-21-triggered MB/DNA scaffold complex from the free MB solution, the amount of streptavidin magnetic nanobeads (strep-MB) was carefully optimized. As indicated in **Fig. S4D**, the photocurrent change ( $\Delta I$ ) increased with the increasing amount of strep-MB, and then increased to a maximum value at 30  $\mu\text{L}$ , indicating a saturated probe load and being selected.

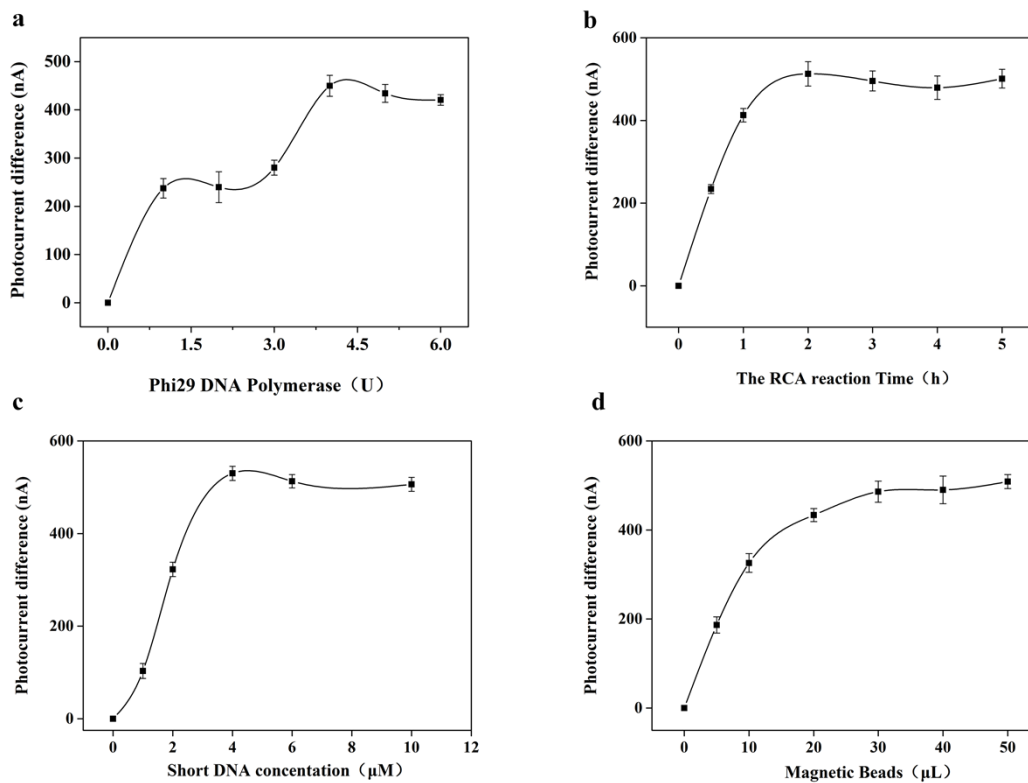

**Fig. S4.** Effect of the concentration of phi29 DNA polymerase (a), RCA time (b); the concentration of short DNA (c); and the concentration of magnetic beads (d) on the PEC response of sensing system.

**Table S2. Comparison of different methods for miR-21 detection**

| <b>method</b>         | <b>Linear range</b> | <b>Detection limit (fM)</b> | <b>ref</b>   |
|-----------------------|---------------------|-----------------------------|--------------|
| Electrochemistry      | 10 fM - 5 nM        | 2.36                        | 1            |
| Electrochemistry      | 10 fM - 1.0 nM      | 10                          | 2            |
| Electrochemistry      | 2 fM - 1 nM         | 2                           | 3            |
| ECL                   | 1pM - 10 nM         | 300                         | 4            |
| ECL                   | 2.34 fM -100 pM     | 0.721                       | 5            |
| Fluorescence          | 0.01 nM - 200 nM    | 10 <sup>4</sup>             | 6            |
| Fluorescence          | 0.2 nM - 20 nM      | 9.8*10 <sup>4</sup>         | 7            |
| Fluorescence          | 100 fM - 50 pM      | 67.3                        | 8            |
| SERS                  | 1.0 fM - 10 nM      | 0.34                        | 9            |
| SERS                  | 10 fM - 100 nM      | 2.88                        | 10           |
| Photoelectrochemistry | 1 fM - 1 nM         | 0.37                        | 11           |
| Photoelectrochemistry | 10 fM - 1 μM        | 3.25                        | 12           |
| Photoelectrochemistry | 1 pM - 100 nM       | 310                         | 13           |
| Photoelectrochemistry | 10 fM - 100 nM      | 3.4                         | 14           |
| Photoelectrochemistry | <b>10 fM - 1 μM</b> | <b>2.443</b>                | In this work |

## References

- [1] P. Fu, S. Xing, M. Xu, Y. Zhao, C. Zhao, Peptide nucleic acid-based electrochemical biosensor for simultaneous detection of multiple microRNAs from cancer cells with catalytic hairpin assembly amplification. *Sens. Actuators B Chem.* 305 (2020) 12754-12763.
- [2] D. Zeng, J. Shen, X. Mi, DNA Tetrahedral nanostructure-based electrochemical miRNA biosensor for simultaneous detection of multiple miRNAs in pancreatic carcinoma. *ACS Appl. Mater. Interfaces.* 9 (2017) 24118-24125.
- [3] C. Fang, K. Kim, B. Yu, S. Jon, M. Kim, H. Yang, Ultrasensitive electrochemical detection of miRNA-21 using a zinc finger protein specific to DNA-RNA hybrids. *Anal. Chem.* 89 (2017) 2024-2031.
- [4] W. Bai, A. Cui, M. Liu, X. Qiao, Y. Li, T. Wang, Signal-off electrogenerated chemiluminescence biosensing platform based on the quenching effect between ferrocene and Ru(bpy)<sub>3</sub><sup>2+</sup>-functionalized meta-organic frameworks for the detection of methylated RNA. *Anal. Chem.* 91 (2019) 11840-11847.
- [5] L. Gálvez, T. Mendiola, C. Sánchez, Carbon nanodot-based electrogenerated chemiluminescence biosensor for miRNA-21 detection. *Microchim Acta.* 188 (2021) 398-410.
- [6] C. Wang, H. Zhang, D. Zeng, W. Sun, H. Zhang, X. Zuo, X. Mi, Elaborately designed diblock nanoprobe for simultaneous multicolor detection of microRNAs. *Nanoscale.* 7 (2015) 15822-15829.

- [7] S. Li, K. He, R. Liao, C. Chen, X. Chen, C. Cai, An interference-free and label-free sandwich-type magnetic silicon microsphere -rGO-based probe for fluorescence detection of microRNA. *Talanta*. 174 (2017) 679-683.
- [8] X. Tang, R. Deng, Y. Sun, X. Ren, M. Zhou, J. Li, Amplified tandem spinach-based aptamer transcription enables low background miRNA detection. *Anal. Chem.* 90 (2018) 10001-10008.
- [9] S. Wen, Y. Su, C. Dai, J. Jia, G. Fan, L. Jiang, R. Song, J. Zhu, Plasmon coupling-enhanced raman sensing platform integrated with exonuclease - assisted target recycling amplification for ultrasensitive and selective detection of microRNA-21. *Anal. Chem.* 91 (2019) 12298-12306.
- [10] X. Du, S. Wu, X. Huang, J. Sun, Ag Nanocubes coupled with heating-enhanced DSN-assisted cycling amplification for surface-enhanced raman spectroscopy detection of microRNA-21. *ACS Appl. Nano Mater.* 4 (2021) 2565-2574.
- [11] N. Fu, L. Wang, X. Zou, C. Li, S. Zhang, B. Zhao, Y. Gao L. Wang, A photoelectrochemical sensor based on a reliable basic photoactive matrix possessing good analytical performance for miRNA-21 detection. *Analyst*. 145 (2020) 73888-7396.
- [12] Y. Wen, M. Qing, S. Chen, H. Luo, N. Li, Y-type DNA structure stabilized p-type CuS quantum dots to quench photocurrent of ternary heterostructure for sensitive photoelectrochemical detection of miRNA. *Sens. Actuators B Chem.* 329 (2021) 129257.

[13] Y. Chu, R. Wu, G. Fan, A. Deng, J. Zhu, Enzyme-free photoelectrochemical biosensor based on the co-sensitization effect coupled with dual cascade toehold-mediated strand displacement amplification for the sensitive detection of microRNA-21. *ACS Sustainable Chem. Eng.* 6 (2018) 11633-11641.

[14] C. Huang, Y. Liu, Y. Sun, F. Wang, S. Ge, J. Yu, Cathode-anode spatial division photoelectrochemical platform based on a one-step DNA walker for monitoring of miRNA-21. *ACS Appl. Mater. Interfaces.* 13 (2021) 35389 - 35396.
